# Supplementary material for: Geometrical and magnetic properties of small titanium and chromium clusters on monolayer hexagonal boron nitride
Source: Royal Society of Chemistry journal article supplement (doi:10.1039/d2cp05638k), 2023-01-01
Supplement: d2cp05638k1.pdf [file d2cp05638k1.pdf]

## Supplementary Materials

### Geometrical and Magnetic Properties of Small Titanium and Chromium Clusters on Monolayer Hexagonal Boron Nitride

Dong Hao<sup>1,2</sup>, Yueyi Wang<sup>2</sup>, Xiangqian Tang<sup>1,2</sup>, Xinjia Zhao<sup>1</sup>, Yang An<sup>1,2</sup>, Wenyu  
Wang<sup>1,2</sup>, Jianmei Li<sup>5</sup>, Xinyan Shan<sup>1,2,4</sup>, Xinghua Lu<sup>1,2,3,4\*</sup>

<sup>1</sup>Beijing National Laboratory for Condensed Matter Physics, Institute of Physics, Chinese  
Academy of Sciences, Beijing 100190, China

<sup>2</sup>School of Physical Sciences, University of Chinese Academy of Sciences, Beijing 100190,  
China

<sup>3</sup>Collaborative Innovation Center of Quantum Matter, Beijing 100190, China

<sup>4</sup>Songshan Lake Materials Laboratory, Dongguan, Guangdong 523808, China

<sup>5</sup>Key Laboratory for Microstructural Material Physics of Hebei Province, School of Science,  
Yanshan University, Qinhuangdao, Hebei 066004, China

\*Corresponding authors: [xhlu@aphy.iphy.ac.cn](mailto:xhlu@aphy.iphy.ac.cn)

#### (1) Optimization of the h-BN

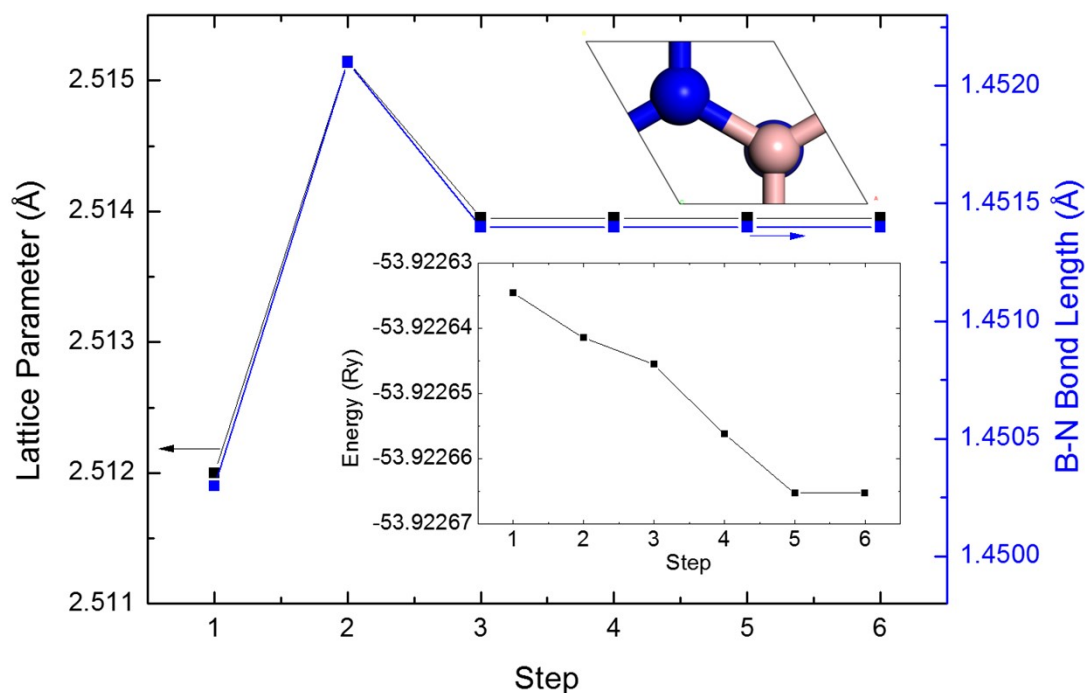

**Figure S1.** The optimization of the h-BN cell. The initial structural parameters of the hexagonal h-BN are obtained from the Materials Project (MP). The magnetic properties of TM clusters are strongly dependent on the final lattice

parameters of the substrate.

## (2) Phonon spectrum and density of phonon states of $\text{Ti}_3$ cluster on h-BN

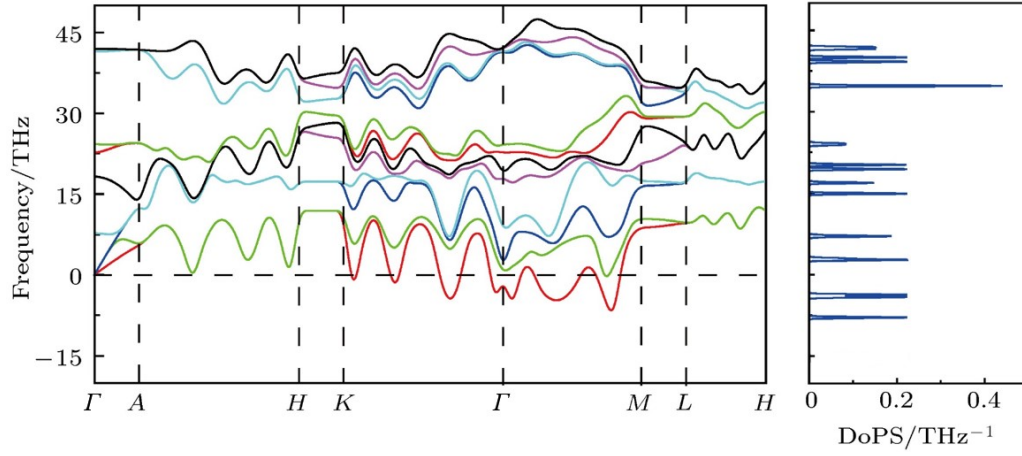

**Figure S2.** Phonon spectrum and density of phonon states of  $\text{Ti}_3$  cluster on h-BN. For  $\text{Cr}_3$  cluster on h-BN, the phonon dispersion curves are roughly the same. In the region between K and M point of the Brillouin zone, a few imaginary phonon modes emerge, perhaps derived from the weak interaction of the clusters in the adjacent periodic cells. Despite this subtle error, the adsorption system is dynamically stable.

## (3) Magnetization of adsorbed Ti clusters

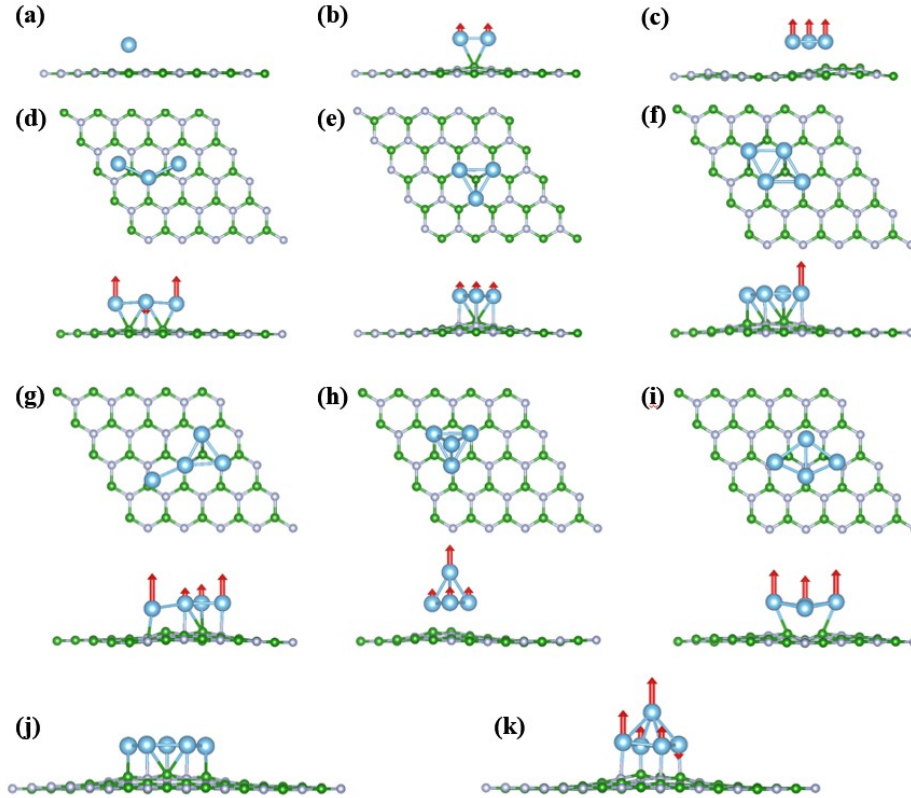

**Figure S3.** Geometries and magnetization of  $\text{Ti}_n$  ( $n = 1, 2, 3, 4, 5$ ) clusters on

the relaxed h-BN supercell, top and side views. **(a)** Ti monomer, **(b)** Ti dimer, **(c)-(e)** Ti trimer, **(f)-(i)** Ti tetramer, and **(j)-(k)** Ti pentamer. Red arrows stand for magnetization of Ti atoms. These structures correspond to Fig. 1 and Table 1. Top views of (a)-(c) and (j)-(k) are shown in the main text. Silvery, green and blue balls represent N, B and Ti atoms, respectively.

The magnetization of adsorbed Ti clusters are shown in Fig. S3. Both collinear and noncollinear spin polarization SCF calculation are performed, and most noncollinear calculations converge to the collinear states. For simplicity, only the lowest-energy magnetic configurations of each geometry are given.

#### (4) Convergence in Computation of $\text{Cr}_n$ ( $n = 1, 2, 3, 4$ ) Clusters on h-BN

Figure S4 shows the convergence of  $\text{Cr}_n$  ( $n=1,2,3,4$ ) clusters adsorbed on monolayer h-BN. The optimization steps increase quickly from 19 to 220 as the number of Cr atoms increase from 1 to 3, except for the noncollinear Cr trimer in which the initial (nearly)  $C_3$  symmetric geometry renders a quick convergence.

The converge issue on the supported clusters of  $\text{Cr}_4$  is investigated. At the first attempt, the hybrid TPSS meta-GGA functional is applied, along with the norm-conserving pseudopotential (NCP) scheme. The energy cutoff is set from 1360 up to 2720 eV to ensure the convergence. The second attempt is the Bayesian error estimate (BEE) functional. We consider  $\text{Cr}_4$  on h-BN with a regular tetrahedron geometry and different magnetic configurations as starting points including collinear and noncollinear, ferromagnetic, antiferromagnetic and ferromagnetic. Unfortunately, both efforts have failed due to extremely slow convergence or oscillation in many electronic bands. Fig. S4(e) shows an example of the non-convergence. The origin of such nonconvergence may be the large value of the adsorption height (3.18 Å) of  $\text{Cr}_4$  on h-BN which is 1.06 Å larger than that of  $\text{Cr}_4$  on Cu(111), hence much weaker hybridization with the orbitals of the substrate atoms.

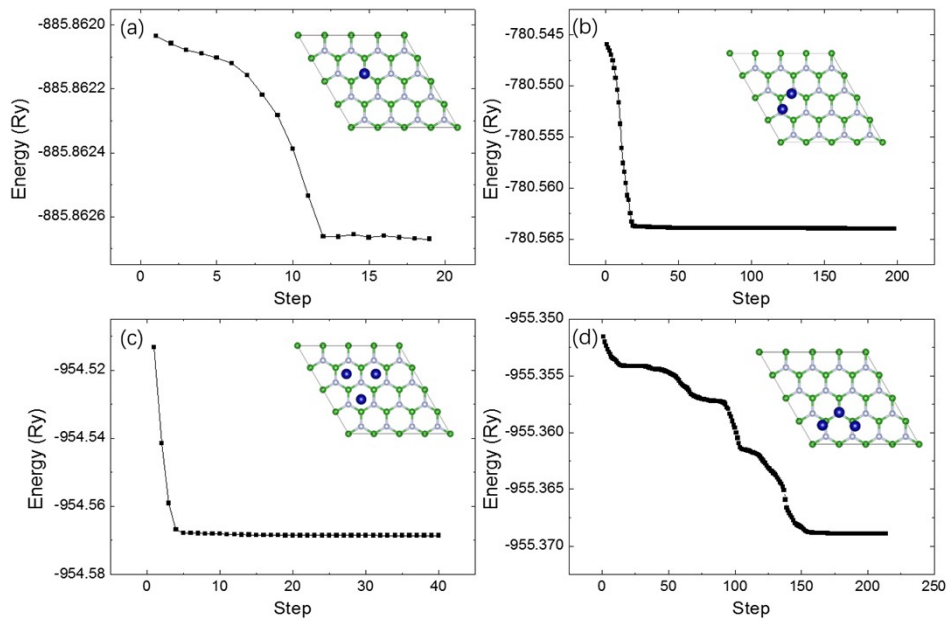

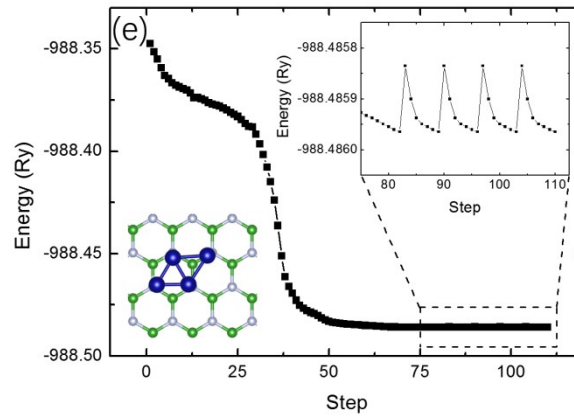

**Figure S4.** Convergence in computation of  $\text{Cr}_n$  clusters on h-BN surface. (a) Cr monomer, (b) Cr dimer, (c) and (d) Cr trimers with noncollinear and collinear magnetization. Insets: top view of the optimized geometries. (e) Cr tetramer. Insets: initial geometry (top view) for the computations.

### (5) Bond lengths and coordinates of stable geometries of Ti/Cr clusters

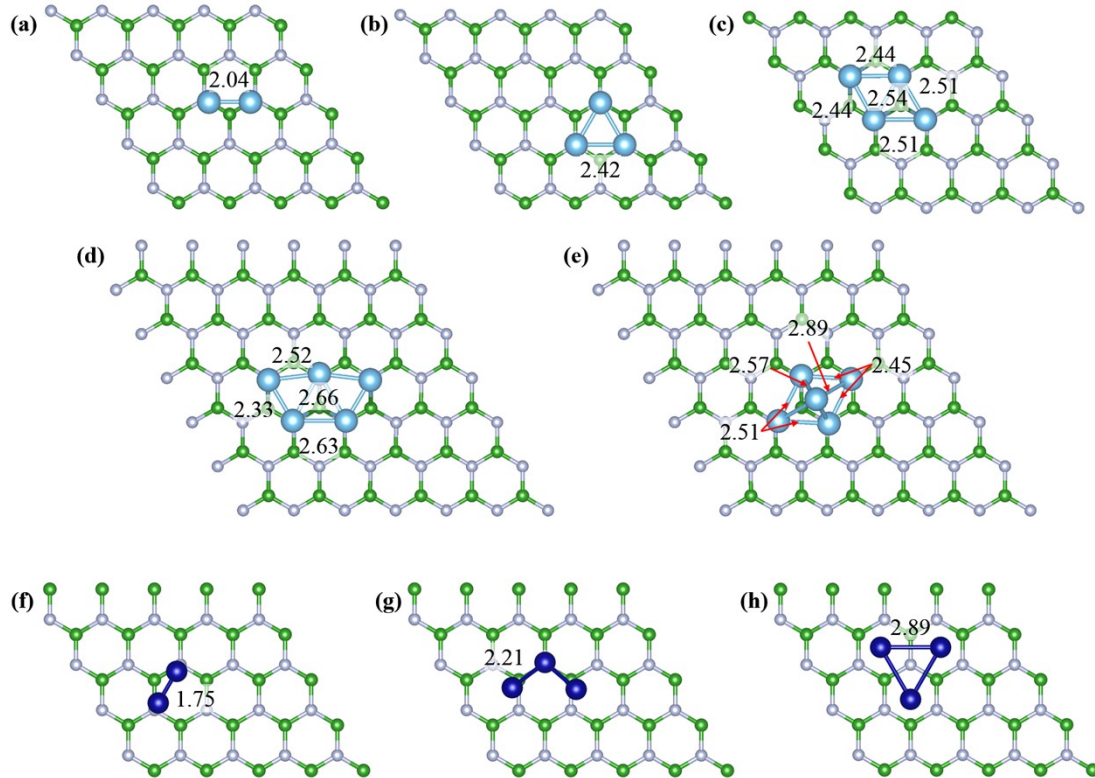

**Figure S5.** The bond lengths of stable geometries of Ti [(a)-(e)] and Cr [(f)-(h)] clusters on h-BN. The corresponding atomic coordinates of the clusters are listed in Table S1.

**Table S1.** The atomic coordinates of the Ti/Cr clusters in Figure S5.

| Geometry   | Atom            | x         | y         | z       |
|------------|-----------------|-----------|-----------|---------|
| Fig. S5(a) | Ti <sub>1</sub> | 4.3354256 | 5.7019085 | 8.45460 |
|            | Ti <sub>2</sub> | 6.3737818 | 5.7040118 | 8.45508 |

|            |                 |           |           |          |
|------------|-----------------|-----------|-----------|----------|
| Fig. S5(b) | Ti <sub>1</sub> | 4.2116028 | 5.8568560 | 8.41284  |
|            | Ti <sub>2</sub> | 1.7879812 | 5.8567308 | 8.41284  |
|            | Ti <sub>3</sub> | 1.7879812 | 3.4332344 | 8.41296  |
| Fig. S5(c) | Ti <sub>1</sub> | 6.6955708 | 8.3254244 | 8.35584  |
|            | Ti <sub>2</sub> | 9.1464860 | 8.3954112 | 8.43120  |
|            | Ti <sub>3</sub> | 6.6253336 | 5.8747596 | 8.43132  |
|            | Ti <sub>4</sub> | 9.1890540 | 5.8308144 | 8.43732  |
| Fig. S5(d) | Ti <sub>1</sub> | 4.9636291 | 7.3709246 | 2.53704  |
|            | Ti <sub>2</sub> | 4.9959307 | 5.0548248 | 2.61624  |
|            | Ti <sub>3</sub> | 9.9733819 | 7.3710749 | 2.53752  |
|            | Ti <sub>4</sub> | 7.6424083 | 7.7185800 | 2.59620  |
|            | Ti <sub>5</sub> | 7.6251307 | 5.0549750 | 2.61648  |
| Fig. S5(e) | Ti <sub>1</sub> | 7.6333939 | 6.2803325 | 4.77192  |
|            | Ti <sub>2</sub> | 5.1433162 | 5.0364955 | 2.84136  |
|            | Ti <sub>3</sub> | 9.9260563 | 7.4275651 | 2.67468  |
|            | Ti <sub>4</sub> | 7.5657859 | 7.6015430 | 2.59284  |
|            | Ti <sub>5</sub> | 7.5657859 | 4.8936173 | 2.59164  |
| Fig. S5(f) | Cr <sub>1</sub> | 3.8035760 | 5.4744451 | 12.1383  |
|            | Cr <sub>2</sub> | 2.0468698 | 3.7305594 | 12.1435  |
| Fig. S5(g) | Cr <sub>1</sub> | 1.9889773 | 2.0997542 | 12.3741  |
|            | Cr <sub>2</sub> | 4.2539955 | 3.4750512 | 11.3967  |
|            | Cr <sub>3</sub> | 4.9992861 | 1.9812650 | 12.3748  |
| Fig. S5(h) | Cr <sub>1</sub> | 6.0980413 | 6.8051709 | 12.18546 |
|            | Cr <sub>2</sub> | 3.2109293 | 6.8049706 | 12.18546 |
|            | Cr <sub>3</sub> | 3.2109293 | 3.9180589 | 12.18546 |

### (6) Spin-resolved Charge Density Difference in Ti<sub>n</sub> Clusters

The spin-resolved charge density differences in Ti<sub>n</sub> clusters are plotted in Fig. S6. Top row: spin up; bottom row: spin down.

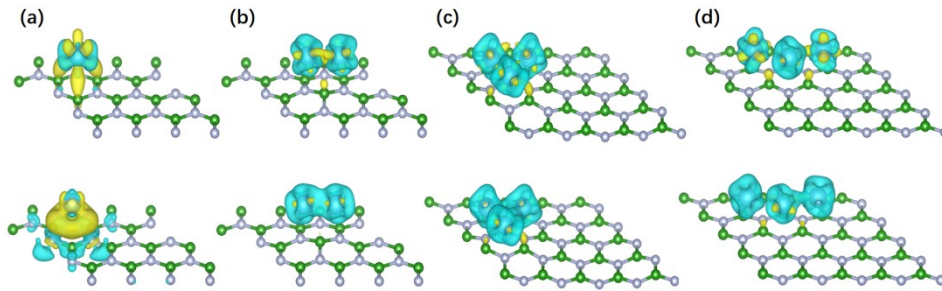

**Figure S6.** Spin-resolved charge density difference in Ti<sub>n</sub> clusters, oblique view. (a) Ti monomer, (b) Ti dimer, (c)-(d) Ti trimers. Top row: spin up; bottom row: spin down.

### (7) Change in Spin-resolved PDOS of electron orbitals for Ti<sub>n</sub> clusters

The bonding between Ti atom and substrate can be identified by the overlapped peaks of PDOS, as shown in Figs. S7(a)-(d). The PDOS of single Ti in Fig. S7(a)

shows that there is a larger overlap with the  $B_p$  orbital than with the  $N_p$  orbital, which agrees with the plot of Fig. 3(a) in the main text. Even when the Ti atoms of the dimer [Fig. S7(b)] or trimer [Figs. S7(c) and (d)] sit on top of the N atoms, the magnitude of  $N_p$  orbital peaks are less than one third of the corresponding  $B_p$  orbitals.

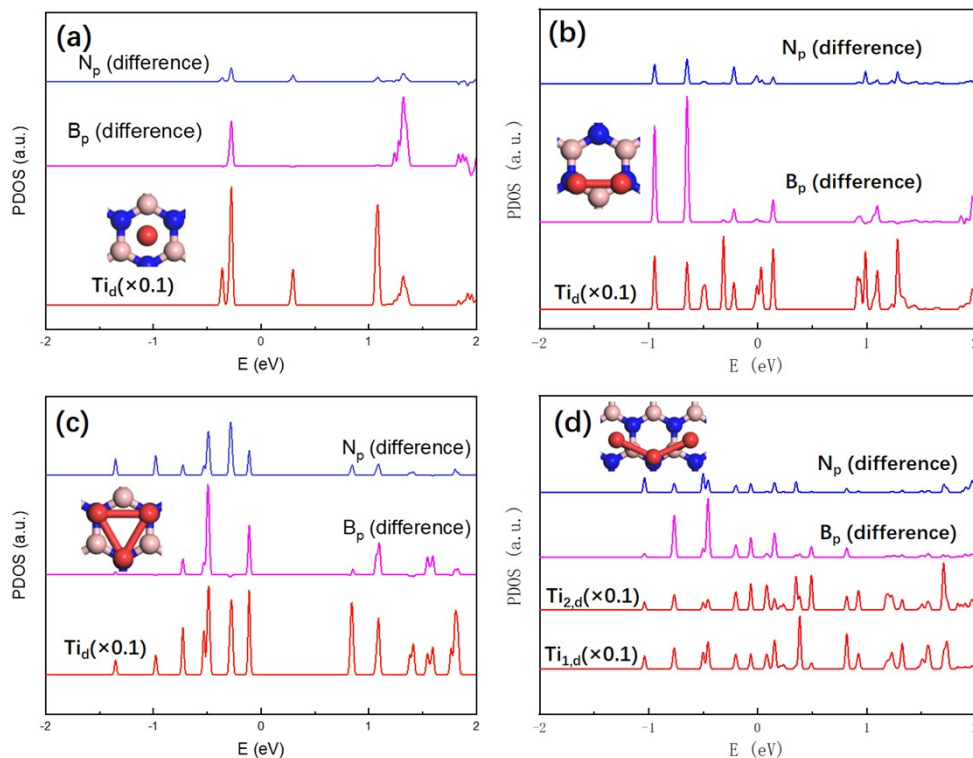

**Figure S7.** Projected density of states of  $Ti_n$  clusters, corresponding to the geometries of clusters in Fig. 1. Intensities of Ti atoms are divided by 10 to fit the plots. PDOS of N and B atoms are the difference between atoms in the adsorbed area and those in the unperturbed area.  $Ti_{1,d}$  and  $Ti_{2,d}$  represent the d orbital of Ti atoms in the middle and on the side of the cluster in (d).

## (8) Comparison of projected density of states (PDOS) between isolated and adsorbed clusters

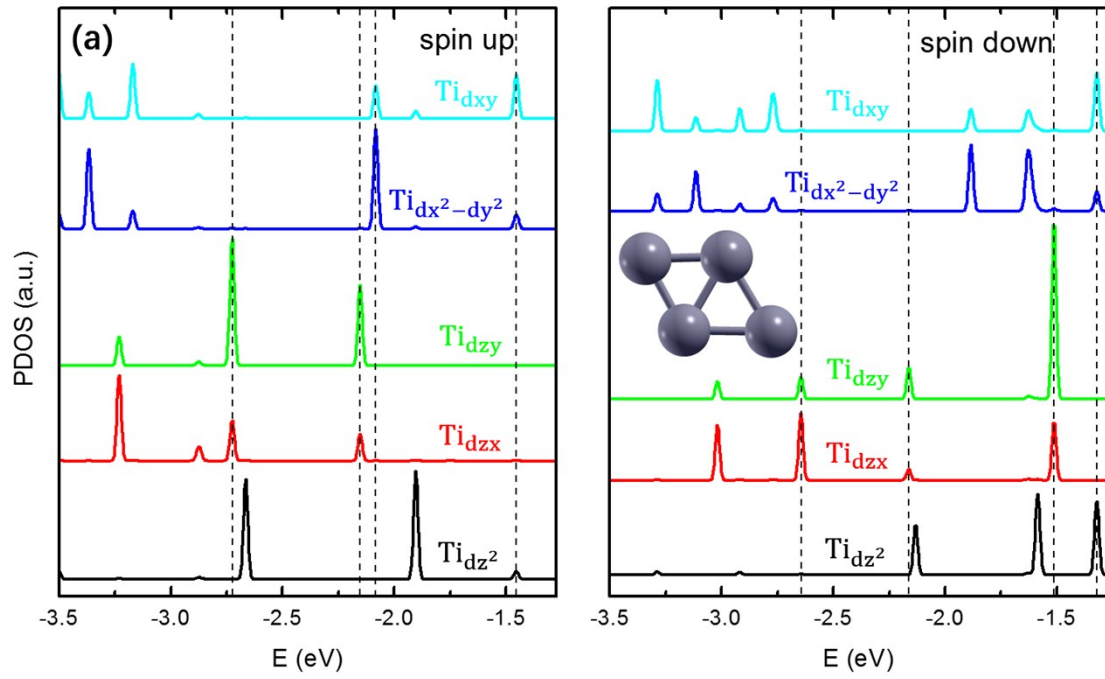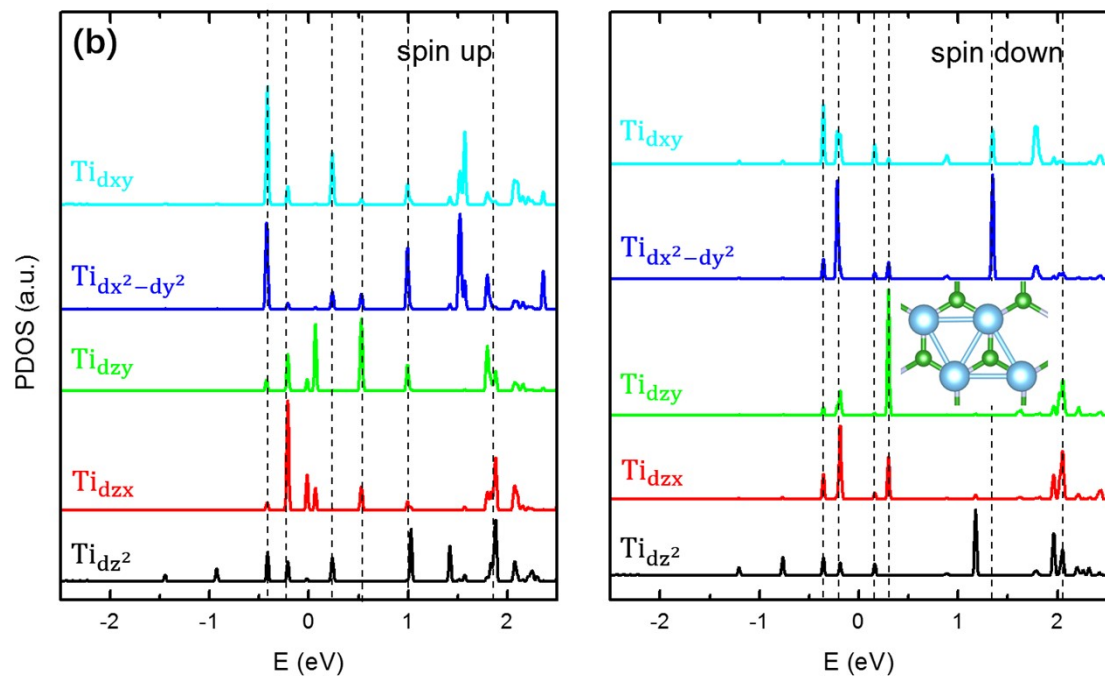

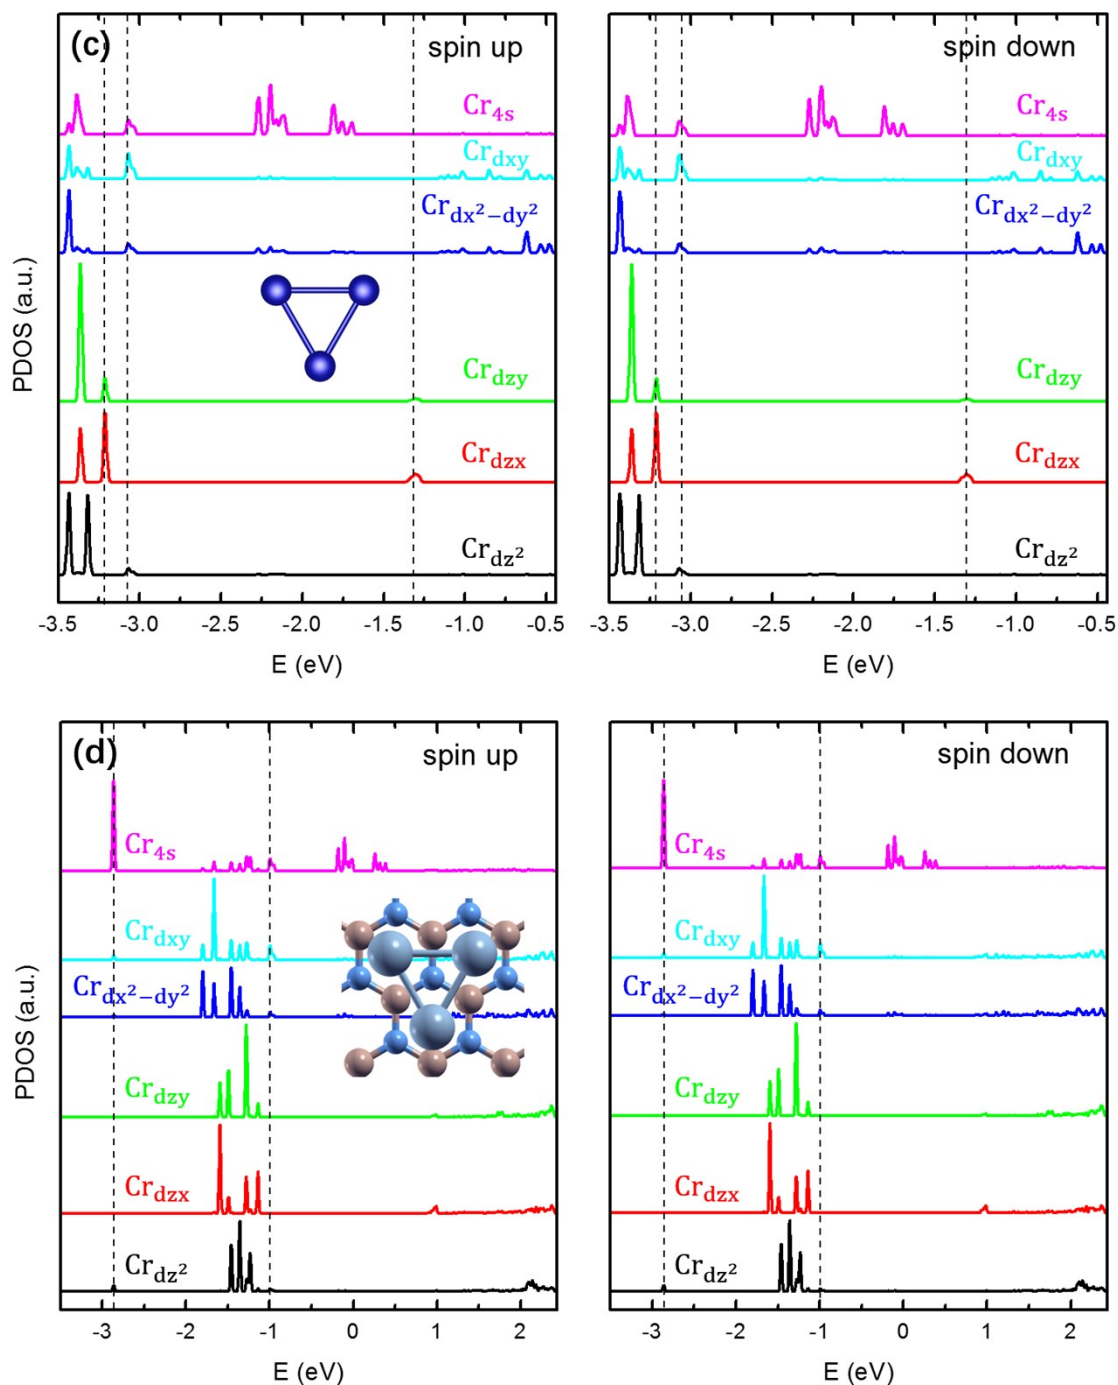

**Figure S8.** Comparison of spin-resolved PDOS of electron orbitals for  $\text{Ti}_4$  [(a) and (b)] and  $\text{Cr}_3$  [(c) and (d)] clusters between isolated and adsorbed clusters. For  $\text{Cr}_3$ , the underlying h-BN substrate results in shift of the sub-orbitals, whereas for  $\text{Ti}_4$ , additional hybridized orbitals emerge above -1.0 eV, besides the shift of Ti orbitals.

## (9) HOMO and LUMO for Ti Clusters and BN Bandgap

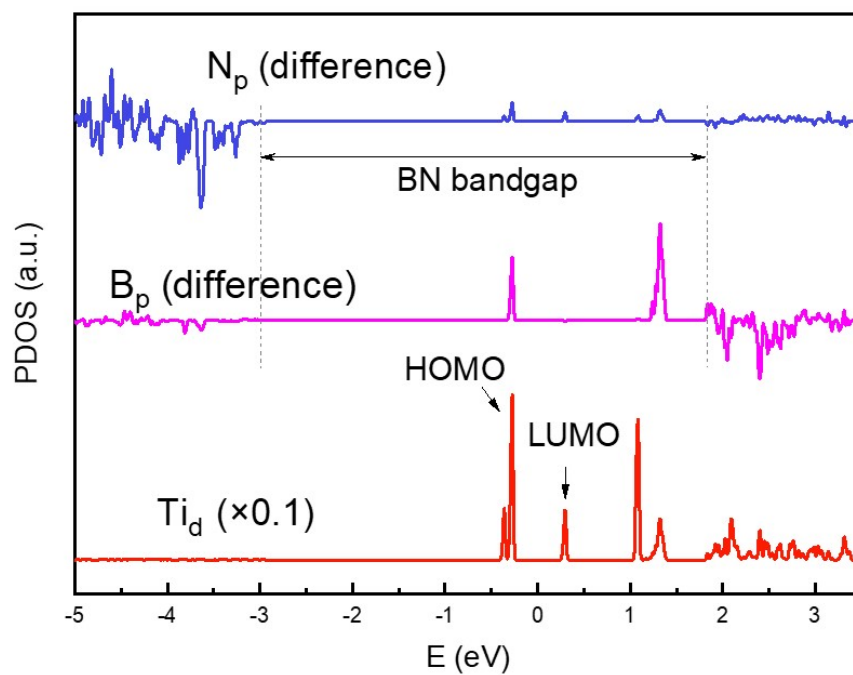

**Figure S9.** The bandgap of h-BN, as well as the top of the valence band and the bottom of the conduction band, derived from the partial density of states of the substrate. The HOMO and LUMO of Ti clusters are also marked in the partial density of states of the Ti atom.
